# Supplementary material for: TIM3 Mediates T Cell Exhaustion during Mycobacterium tuberculosis Infection
Source: PubMed Central journal article supplement (PMC4788425; doi:10.1371/journal.ppat.1005490), 2016-03-11
Supplement: ppat.1005490.s001.pdf [file ppat.1005490.s001.pdf]

# CD4

## aCD3/CD28

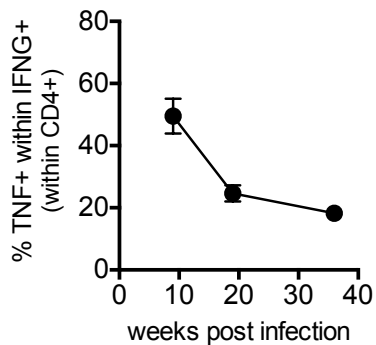

## ESAT6

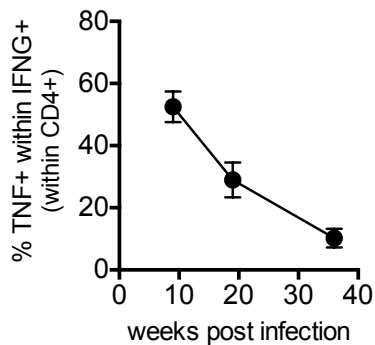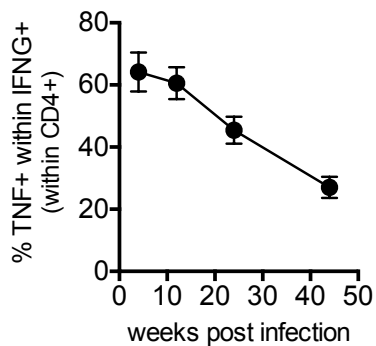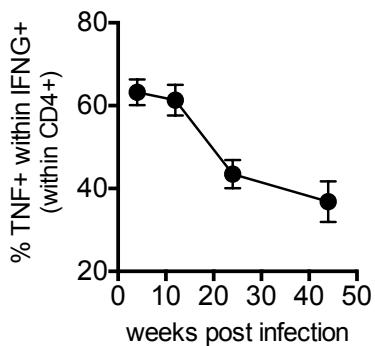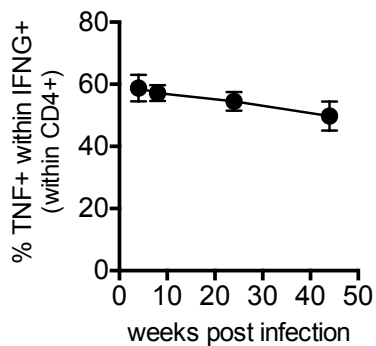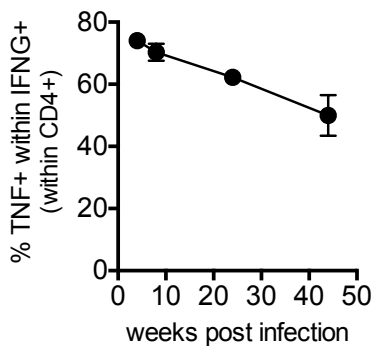

# CD8

## aCD3/CD28

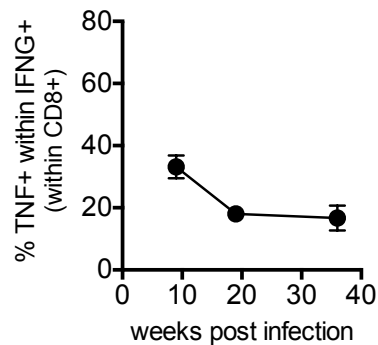

## TB10.4<sub>4-11</sub>

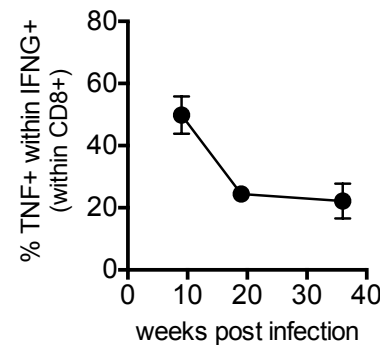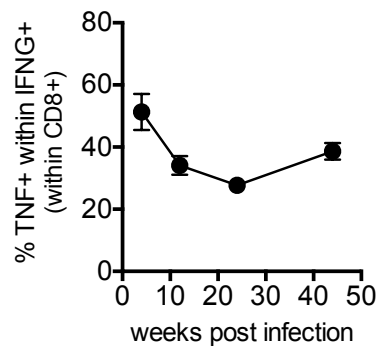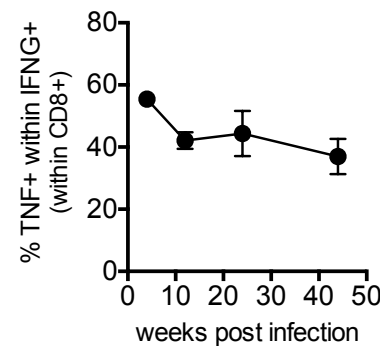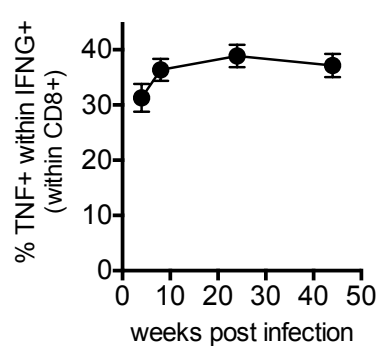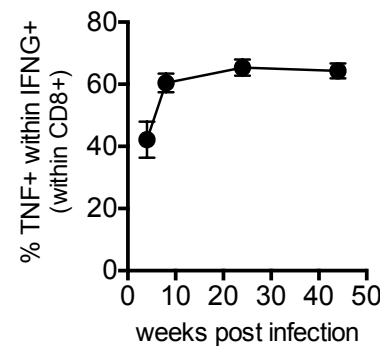

Experiment 'A'

Experiment 'B'

Experiment 'C'
