# Supplementary material for: TIM3 Mediates T Cell Exhaustion during Mycobacterium tuberculosis Infection
Source: PubMed Central journal article supplement (PMC4788425; doi:10.1371/journal.ppat.1005490), 2016-03-11

A.

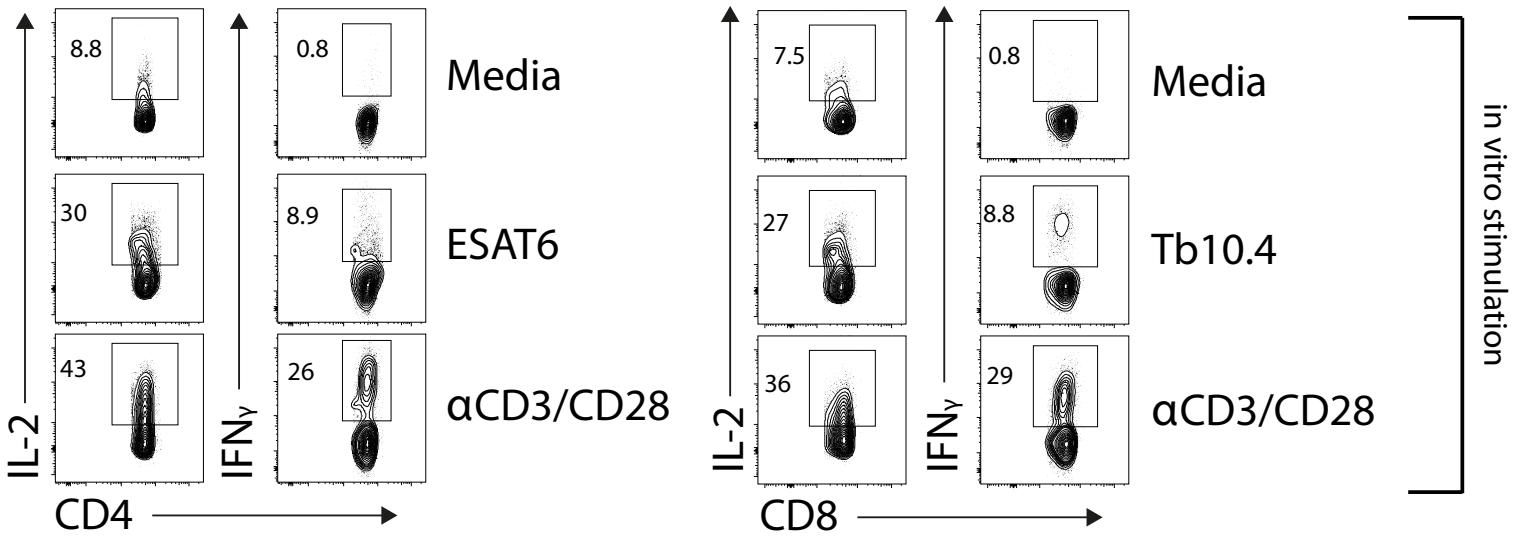

B.

CD4<sup>+</sup> T cell response to ESAT6

CD8<sup>+</sup> T cell response to TB10

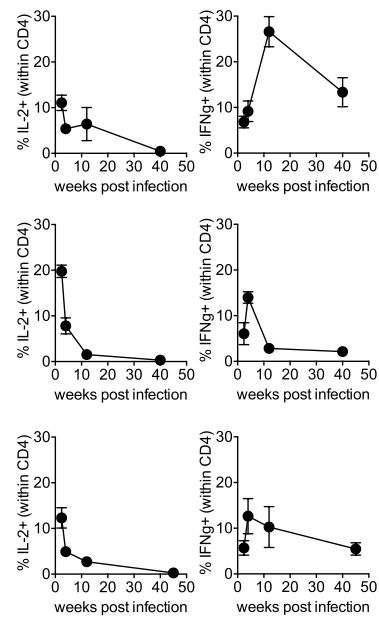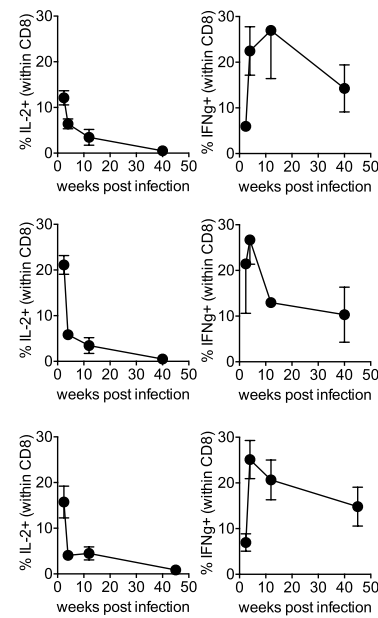

C.

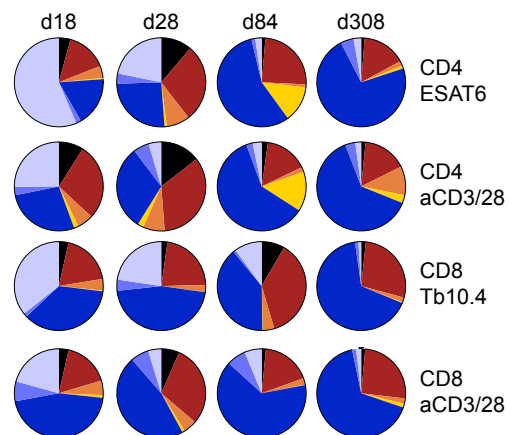

Supplement: ppat.1005490.s002.pdf [file ppat.1005490.s002.pdf]
