# Supplementary material for: TIM3 Mediates T Cell Exhaustion during Mycobacterium tuberculosis Infection
Source: PubMed Central journal article supplement (PMC4788425; doi:10.1371/journal.ppat.1005490), 2016-03-11

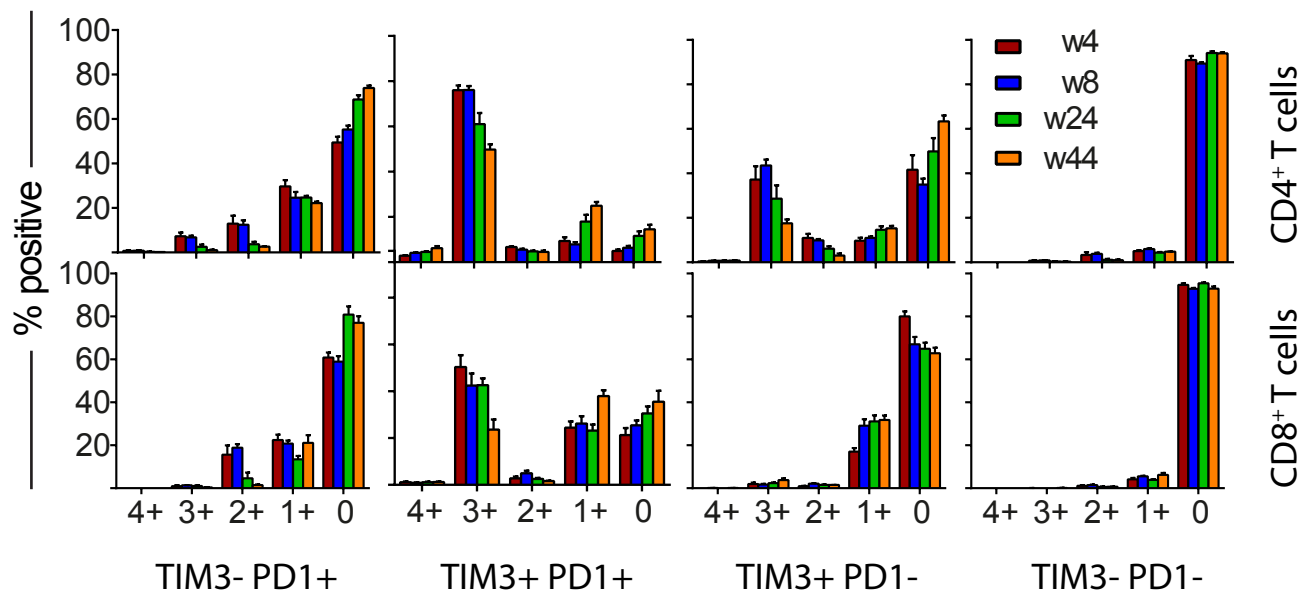

Supplement: ppat.1005490.s003.pdf [file ppat.1005490.s003.pdf]
